# Supplementary material
Source: Springer Nature journal article supplement (https://www.springerprofessional.de/resource/supplementary/13688_2014_13_MOESM29_ESM.pdf/11893772)

# impact of loc. opt. size

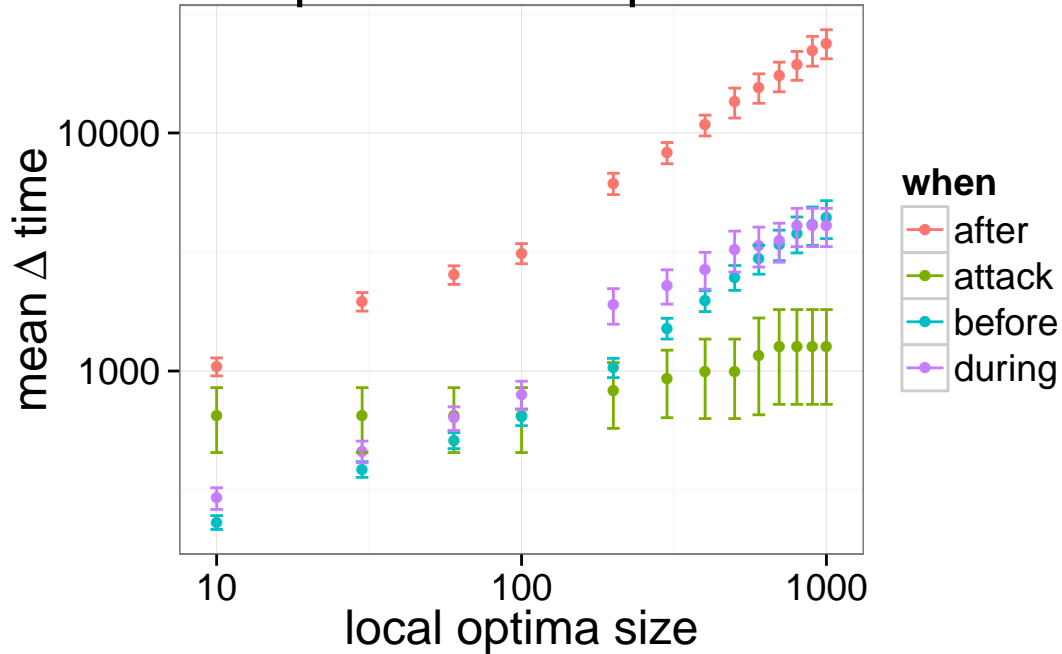

Supplement: MOESM29 [file 11893772]
